# Contrasting Levels of Clonal and Within-Population Genetic Diversity between the 2 Ecologically Different Herbs *Polygonatum stenophyllum* and *Polygonatum inflatum* (Liliaceae)

Mi YOON CHUNG, JORDI LÓPEZ-PUJOL, JAE MIN CHUNG, KI-JOONG KIM, AND MYONG GI CHUNG

From the Department of Biology and the Research Institute of Natural Science, Gyeongsang National University, Jinju 660–701, Republic of Korea (M.Y. Chung and M.G. Chung); the BioC-GReB, Botanic Institute of Barcelona (IBB-CSIC-ICUB), Barcelona 08038, Spain (López-Pujol); the Department of Plant Resources Conservation, Korea National Arboretum, Pocheon 487–821, Republic of Korea (J.M. Chung); and the School of Life Sciences, Korea University, Seoul 136–701, Republic of Korea (Kim). Mi Yoon Chung is now at the Department of Biology Education, Seowon University, Cheongju 361–742, Republic of Korea.

Address correspondence to Myong Gi Chung at the address above, or e-mail: [mgchung@gnu.ac.kr](mailto:mgchung@gnu.ac.kr).

## Abstract

Comparative studies on clonal and genetic structure between ecologically contrasting congeners may provide valuable insights into the mechanisms promoting the maintenance of genetic diversity in clonal plant species. *Polygonatum stenophyllum* has long rhizomes (ca. 30–40 cm long) and largely occurs on sandy soils in open river banks, whereas its congener *Polygonatum inflatum* has short ones (ca. 5–10 cm long) and occurs on humic soils under deciduous forests. Using 21 allozyme loci, we comparatively assessed levels of clonal and genetic diversity in the 2 clonal species. Seven populations of *P. stenophyllum* consisted of single clones, and levels of within-population clonal and genetic variation were considerably lower than those of *P. inflatum*. However, when samples were pooled, *P. stenophyllum* harbored higher genetic variation than *P. inflatum*, which is due to higher among-population genetic differentiation in the former species compared with the latter ( $F_{ST} = 0.636$  vs.  $F_{ST} = 0.165$ ). Our data suggest that populations of *P. stenophyllum* have been mainly founded by a single seed or rhizome (through river water) or by a few seeds, whereas populations of *P. inflatum* would have been established through multiple, repeated seedling recruitment. Moderate levels of genetic diversity in a population of *P. stenophyllum* located at the foot of the Baekdudaegan Mountains and in all the populations of *P. inflatum* are consistent with the previous hypothesis that these mountains served as a glacial refugium for many boreal species of the Korean Peninsula.

**Subject areas:** Conservation genetics and biodiversity; Population structure and phylogeography

**Key words:** clonal diversity, conservation, ecological traits, genetic diversity, *Polygonatum*, population history

The extent of clonal growth in plant populations (the proportion of clonal vs. sexual reproduction) has crucial effects on their genetic diversity and demographic structure (Eriksson 1989). A certain level of genetic recombination may enhance clonal diversity and, thus, the potential to adapt to a changing environment (Balloux et al. 2003). The studies of Eriksson (1989, 1993) have demonstrated how genetic diversity is modulated depending on the seedling recruitment strategy of clonal plants. Under the “initial seedling recruitment” (ISR) strategy, no recruitment occurs after the

establishment of the initial cohort, which could result in a decrease of genetic diversity over time, and ultimately populations would be composed of a small number of large, old, and even-aged clones. At the other extreme, in the “repeated seedling recruitment” (RSR) strategy, a steady recruitment of genets occurs and populations will contain clones of variable age and size, largely maintaining local genetic variability (Eriksson 1989). The RSR seems to predominate among species that propagate above ground (e.g., by stolons or creeping aerial stems) with long-distance seed dispersal, such as

many species inhabiting grasslands. The ISR, instead, is more common in species that propagate below ground (e.g., by rhizomes, corms, or bulbs) with short-distance seed dispersal, such as those inhabiting woodlands (Eriksson 1989). Because of this linkage between seedling recruitment strategy and clonal structure, it would be possible to retrospectively infer seedling recruitment of a given species by analyzing the clonal and genetic structure of its populations.

As Amat et al. (2013) noted, clonal growth could be “a double-edged sword” for rare and endangered species because the short-term insurance against extinction might result in a long-term hazard of random genetic drift in small inbred populations with low fecundity. On the one hand, for many clonal plant species inhabiting in heterogeneous habitats or depending on disturbance, asexual reproduction might be the best strategy to ensure survival. The clonal nature of many species represents an advantage for colonizing and competing successfully in a range of habitats. On the other hand, sexual reproduction can be (almost permanently) often suppressed by natural and human-mediated artificial factors such as canopy closure, flooding, mowing, and grazing (Chung et al. 1991; Kerley et al. 1993; Schaal and Leverich 1996; Kudoh et al. 1999; Amat et al. 2013). This situation may lead to lowered genetic diversity or inbreeding, especially in small populations (Charpentier et al. 2000; Honnay and Bossuyt 2005). For self-incompatible clonal species, they may not be able to reproduce sexually if their populations contain a single clone (Godt et al. 1997).

As plant congeners usually share similar life-history traits, in particular breeding systems and seed dispersal mechanisms (due to the “phylogenetic signal”; Losos 2008), comparisons of congeneric species pairs allow to partially control the variation that is attributable to the phylogeny (Karron 1987; reviewed in Godt and Hamrick 2001). This comparative approach could lead to less biased interpretations of genetic results between species pairs, in which 1 species is the target and the other is the reference. With this in mind, we selected 2 congeneric boreal herbaceous perennials, *Polygonatum stenophyllum* Maxim. (as the target species) and *Polygonatum inflatum* Kom. (as the reference species) to comparatively investigate clonal/genetic diversity and structure. *Polygonatum stenophyllum* is distributed from Primorsky Krai in Russian Far East to the Korean Peninsula, including 3 northeastern provinces (Heilongjiang, Jilin, and Liaoning) in China (Chen and Tamura 2000). In northeastern China, *P. stenophyllum* occurs under forests and in thickets. Except for PS-9 to PS-11 (Figure 1), all populations of *P. stenophyllum* in central Korea are located west of the so-called “Baekdudaegan” (the main mountain system of the Peninsula, which runs north to south with ca. 1625 km long; Figure 1). *Polygonatum inflatum* is more widely distributed (occurring in the same 3 northeastern provinces in China, the Korean Peninsula, and Japan) and inhabits forests or forest margins from near sea level to 1000 m above sea level (a.s.l.).

On central Korea, *P. stenophyllum* mainly grows on exposed sandy soils with low nutrient levels in river banks where frequent disturbance occurs (because of flooding; Song et al. 2009). In such highly disturbed habitats, new populations along the same river systems are likely to be established by vegetative propagules rather than by seeds. To adapt

to nutrient-poor sandy soils in open, unstable river banks, *P. stenophyllum* appears to have a highly clonal growth form with extensive underground rhizomes (ca. 3–7 mm wide, 30–40 cm long) that are easily broken. This particular type of life-history strategy is also found in its congener *P. humile* (which grows in sunny grasslands and nutrient-poor sand dunes; Hasegawa and Kudo 2005) as well as in coastal plants including the widespread *Calystegia soldanella* and *Lathyrus japonicus* and the eastern Asian *Carex pumila* and *C. kobomugi* (Ohsako 2010). In contrast, *P. inflatum* has relatively thick and short rhizomes (ca. 7–10 mm wide, 5–10 cm long) and grows in stable and fertile soils of deciduous forests in the Baekdudaegan Mountains (PI-1 to PI-3; Figure 1) and its mountainous branches (PI-4; Figure 1). During our preliminary field surveys, we found that shoots in 3 populations (PS-1, PS-5, and PS-11; Figure 1) of *P. stenophyllum* did not bear any mature fruit, and we have never found seedlings within those relatively small populations. Another liliaceous herb, *Hosta clausa*, often co-occurring with *P. stenophyllum*, reproduces mainly vegetatively by rhizomes. Chung et al. (1991) suggested that extensive clonal growth compensates for the inefficiency of sexual reproduction under unstable habitat conditions. Frequent flooding due to high precipitation brought by typhoons or rainy spells in summer would have negatively affected the fruit maturation of *P. stenophyllum* and *H. clausa* (Chung et al. 1991). Unlike *P. stenophyllum*, however, we have observed both mature fruits and seedlings of *P. inflatum* (in populations PI-3 and PI-4).

These observations (no mature fruits and predominantly asexual reproduction) for *P. stenophyllum* may lead us to speculate that shoots—that occur on the order of 10s to several 1000s within certain populations—belong to a single or to a few clones (genets). If this prediction is true, we expect that ISR model would operate within *P. stenophyllum* populations, whereas RSR would be prevalent for *P. inflatum* populations. Directly related to this second prediction, we also expect that within-population clonal (genotypic) diversity and genetic variation found in *P. stenophyllum* would be considerably lower than those harbored by *P. inflatum*, whereas among-population genetic divergence would be higher in *P. stenophyllum* compared with *P. inflatum*. In this study, we conduct an allozyme study throughout the distributional range of *P. stenophyllum* and *P. inflatum* in South Korea to evaluate these predictions. As *P. stenophyllum* has been listed as “critically endangered” by the Ministry of Environment of South Korea due to its rarity and limited distribution in the country (Ministry of Environment 2005), we use genetic data obtained from this study to provide guidelines for the management and recovery of this species.

## Materials and Methods

### Study Species

The stem of *P. stenophyllum* is erect, 40–120 cm tall, with leaves in whorls of 4–6 on each node. In June, each flowering shoot produces 2 reflexed peduncles on each node from which 2 white cylindrical flowers (0.8–1.3 cm long) hung down on each

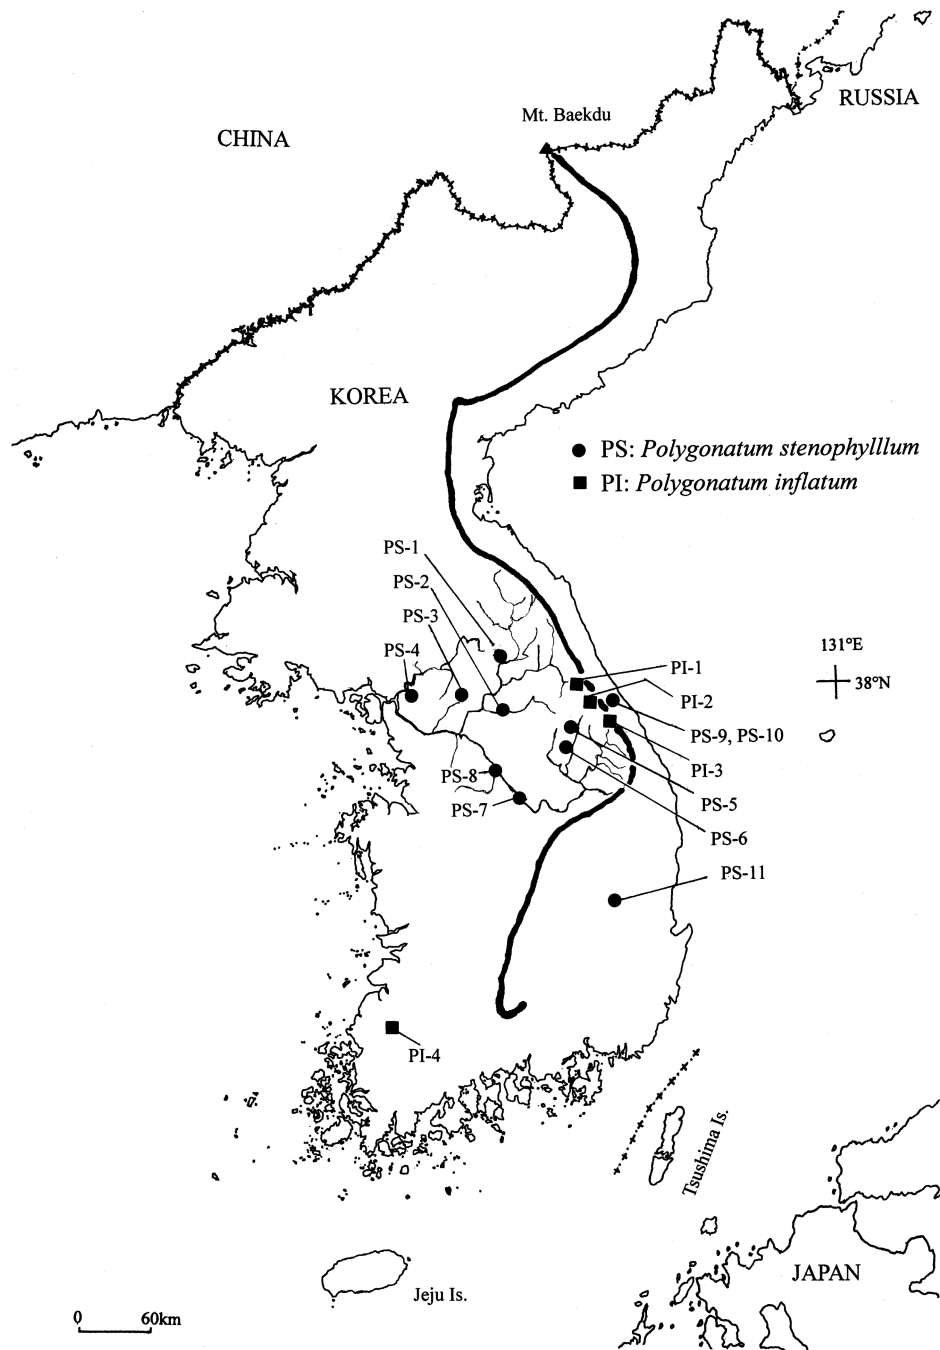

**Figure 1.** Locations of sampled populations of *Polygonatum stenophyllum* (PS-1 to PS-11) and *Polygonatum inflatum* (PI-1 to PI-4) in the Korean Peninsula. Thick solid line indicates the location and shape of the main mountain range of the country, the so-called “Baekdudaegan,” which runs north to south along the Korean Peninsula. The thin curved line represents river systems in central Korea. Nine populations occur along rivers or streams, or on river banks: PS-1 on riverbank of Bukhan River; PS-2 on riverside of Hongcheon River, a branch of Bukhan River; PS-3 on stream bank of Bongcheonsa Stream, a branch of Han River; PS-4 on stream bank of Munsan Stream, a branch of Imjin River; PS-5 and PS-6 on riverside and on bank of Han River (Dong River); PS-7 and PS-8 on riverbank of Namhan River; and PS-11 on riverside of Gilan Stream.

peduncle. Fruit (berry, 7–8 mm in diameter) is globose, black at maturity, and contains 4–8 seeds. The stem of *P. inflatum* is arching and relatively short (30–60 cm long) and stout, with 5–9 alternative leaves. In June, each flowering shoot produces

1 peduncle on each node from which 3–7 pale green campanulate-cylindric, pendulous flowers (2.2–2.5 cm long) hung down. Fruit (berry, 1.0–1.2 cm in diameter) is globose, bluish-black, and 9–13 seeded.

Although breeding systems of *P. stenophyllum* and *P. inflatum* are not known, many *Polygonatum* species are self-incompatible or have very low selfing ability, with their flowers mainly pollinated by bumblebees (Yasaka et al. 1994; Guitián et al. 2001, 2004; Hasegawa and Kudo 2005; Ohara et al. 2007; Kosiński 2012). The seeds contained in the fruits (black to bluish-black) of *Polygonatum* species are dispersed by birds (DeFilipps 1980; Thompson 1981).

**Population Sampling**

For *P. stenophyllum*, we collected leaf samples from 470 shoots (with a mean of total samples  $[N_T] = 43$  and a range of 13–91 samples per population; Table 1) from 11 populations (PS-1 to PS-11; Figure 1). The area occupied by these populations varied widely, from 10 (5 × 2 m, PS-9) to 4000 m<sup>2</sup> (200 × 20 m, PS-8), with density also varying (Table 1). Except for PS-9 and PS-10, populations occur along rivers or streams, or on river banks (Figure 1). Interestingly, PS-9 and PS-10 are located on the foot of a mountain hill and are separated by 87 m in linear distance. As *P. stenophyllum* propagates extensively by branching rhizomes (and thus, it forms mat-like clusters of shoots), we collected samples at least at 2-m intervals to avoid duplicate samples with the exception of relatively small populations (PS-3, PS-9 to PS-11; Table 1). For these small populations, we collected samples at about 30-cm intervals to get sample sizes over 10 shoots.

For *P. inflatum*, we collected samples from all visually identified shoots because populations are very small (<50 shoots) and individuals are scatteredly distributed. The area occupied by populations is relatively homogeneous, from 500 (50 × 10 m, PI-2) to 800 m<sup>2</sup> (40 × 20 m, PI-3); thus, we got similar sample sizes (30–33 shoots; Table 1). To minimize the damage to these plants, we collected only 1 leaf per individual.

**Enzyme Electrophoresis**

Leaf samples were wrapped in wet paper towels, placed in plastic bags, returned to the laboratory, and then stored at 4 °C until protein extraction. We extracted enzymes from individual leaf samples as described in Chung and Kang (1994). We conducted electrophoresis on 13% starch gels, with 2 buffer systems. We used a modification (Haufler 1985) of the system 6 of Soltis et al. (1983) to resolve alcohol dehydrogenase (*Adb-1* and *Adb-2*), diaphorase (*Dia-1*, *Dia-2*, *Dia-3*, and *Dia-4*), fluorescent esterase (*Fe-1* and *Fe-2*), phosphoglucosomerase (*Pgi-1*, *Pgi-2*, and *Pgi-3*), phosphoglucocomutase (*Pgm-1* and *Pgm-2*), and triosephosphate isomerase (*Tpi-1* and *Tpi-2*). We also used the morpholine-citrate buffer system (pH 6.1) of Clayton and Tretiak (1972) to resolve isocitrate dehydrogenase (*Idb-1* and *Idb-2*), malate dehydrogenase (*Mdb-1* and *Mdb-2*), and 6-phosphogluconate dehydrogenase (*6Pgd-1* and *6Pgd-2*). We followed stain recipes from Soltis et al. (1983) except for diaphorase (Cheliak and Pitel 1984). We designated putative loci sequentially, with the most anodally migrating isozyme designated as 1, the next 2, and so on. We also designated different alleles within each locus sequentially by alphabetical order. The observed enzyme banding patterns were consistent with their typical subunit structure and subcellular compartmentalization in diploid plants (Weeden and Wendel 1989).

**Identification of Clones, Clonal Diversity, Genetic Diversity, and Genetic Structure**

To identify clones and to conduct further genetic analyses, we considered a locus to be polymorphic when 2 or more alleles were observed, regardless of their frequencies. As multiple

**Table 1** Summary of clonal diversity measures examined in 11 populations of *Polygonatum stenophyllum* and 4 populations of *Polygonatum inflatum*

| Species/<br>population          | Area (m <sup>2</sup> ) | $N_T$ | $N_G$ | $P_{gen} F_{IS}$ | $R$   | $D$   | $ED$  | $\beta$ (95% CIs for $b_p^a$ ) |
|---------------------------------|------------------------|-------|-------|------------------|-------|-------|-------|--------------------------------|
| <i>Polygonatum stenophyllum</i> |                        |       |       |                  |       |       |       |                                |
| PS-1                            | 20 × 10                | 36    | 1     | 0.778            | 0.000 | 0.000 | na    | na                             |
| PS-2                            | 70 × 10                | 46    | 3     | 0.643            | 0.044 | 0.371 | 0.478 | 0.104 (−0.374, 0.166)          |
| PS-3                            | 10 × 10                | 21    | 1     | 0.905            | 0.000 | 0.000 | na    | na                             |
| PS-4                            | 100 × 10               | 74    | 13    | 0.234            | 0.164 | 0.691 | 0.616 | 0.181 (−0.234, −0.128)         |
| PS-5                            | 50 × 10                | 31    | 1     | 0.953            | 0.000 | 0.000 | na    | na                             |
| PS-6                            | 100 × 10               | 68    | 1     | 0.974            | 0.000 | 0.000 | na    | na                             |
| PS-7                            | 30 × 20                | 33    | 1     | 1.000            | 0.000 | 0.000 | na    | na                             |
| PS-8                            | 200 × 20               | 91    | 5     | 0.424            | 0.044 | 0.456 | 0.511 | 0.097 (−0.129, −0.064)         |
| PS-9                            | 5 × 2                  | 13    | 1     | 0.926            | 0.000 | 0.000 | na    | na                             |
| PS-10                           | 20 × 5                 | 42    | 5     | 0.186            | 0.098 | 0.611 | 0.672 | 0.214 (−0.271, −0.157)         |
| PS-11                           | 6 × 2                  | 15    | 1     | 0.946            | 0.000 | 0.000 | na    | na                             |
| Average                         |                        | 43    | 3     | 0.724            | 0.032 | 0.194 | 0.569 | 0.148                          |
| <i>Polygonatum inflatum</i>     |                        |       |       |                  |       |       |       |                                |
| PI-1                            | 30 × 20                | 31    | 20    | 0.017            | 0.633 | 0.959 | 0.818 | 1.117 (−1.626, −0.608)         |
| PI-2                            | 50 × 10                | 30    | 20    | 0.025            | 0.655 | 0.968 | 0.863 | 1.455 (−2.503, −0.406)         |
| PI-3                            | 40 × 20                | 33    | 18    | 0.039            | 0.531 | 0.951 | 0.885 | 1.116 (−1.807, −0.425)         |
| PI-4                            | 20 × 30                | 31    | 17    | 0.042            | 0.533 | 0.948 | 0.878 | 1.091 (−1.674, −0.509)         |
| Average                         |                        | 31    | 18    | 0.031            | 0.588 | 0.957 | 0.861 | 1.195                          |

na, not applicable;  $N_T$ , number of individuals sampled (including clonal ramets);  $N_G$ , number of individuals excluding clonal ramets;  $P_{gen} F_{IS}$ , probability of the identical MLG occurring by chance due to sexual reproduction by taking into account departures from H-W equilibrium;  $R$ , genotypic richness;  $D$ , Simpson diversity index of clonal heterogeneity;  $ED$ , Simpson evenness index;  $\beta$ , parameter for Pareto distribution (−1 × regression slope,  $b_p$ ); CIs, confidence intervals.

<sup>a</sup>Except for PS-2 ( $P = 0.128$ ), all log–log regressions between  $N_{\geq X}$  on  $X$  indicated significance with  $P < 0.05$ .

ramets ( $N_T$ ) representing allozyme-based identical multilocus genotypes (MLG) could result either from clonal propagation or distinct sexual reproduction events, it is important to discriminate these cases to correctly identify clonal ramets. Using the program GenClone 2.0 (Arnaud-Haond and Belkhir 2007), we calculated  $P_{\text{gen}} F_{\text{IS}}$ , the probability of identical MLG occurring by chance due to sexual reproduction by taking into account departures from Hardy–Weinberg (H–W) equilibrium (Parks and Werth 1993; Arnaud-Haond et al. 2007). We averaged  $P_{\text{gen}} F_{\text{IS}}$  estimates generated from one such value for each MLG in each population and used a probability  $P_{\text{gen}} < 0.05$  cut off for the discrimination of ramets versus genets. Under this criterion, we prepared a second data set excluding all but 1 clonal ramet per genet, resulting in each distinct MLG only represented once per population ( $N_G$ , the number of individuals excluding clonal ramets).

Arnaud-Haond et al. (2007) and Becheler et al. (2010) recommend the use of 4 parameters to describe clonal diversity and distribution: genotypic richness [ $R = (N_G - 1)/(N_T - 1)$ ; Dorken and Eckert 2001], the Simpson diversity index (Pielou 1969) of clonal heterogeneity ( $D$ , the probability of encountering distinct MLG when randomly taking 2 units in a population) and its equitability ( $ED$ , Simpson evenness index; Hurlbert 1971), and the Pareto index  $\beta$  (Arnaud-Haond et al. 2007). To characterize the genet size ( $N_R$ , the number of ramets belonging to each genet), we fitted a cumulative function of the Pareto distribution to the data following the method of Arnaud-Haond et al. (2007). This function takes the following form:  $N_{\geq X} = a X^{-\beta}$ , where  $N_{\geq X}$  is the number of genets containing  $X$  or more ramets and  $a$  is a constant. For each population per species, we obtained the shape parameter  $\beta$  by multiplying  $-1$  by the linear regression slope ( $b_p$ ) of  $\log_{10}$  (reverse cumulative frequency of  $N_{\geq X}$ ) versus  $\log_{10}(X)$ , and to check the quality of the Pareto approximation, we estimated its associated coefficient of determination ( $R^2$ ). To test whether each  $b_p$  was statistically significant under the null hypothesis ( $b_p = 0$ ), we estimated the 95% confidence intervals (CIs) around  $b_p$  using the classical least-squares regression theory. The estimated  $b_p$  (and thus,  $\beta$ ) was considered significant when its 95% CIs did not overlap 0. Both  $R$  and  $ED$  influence the Pareto index  $\beta$  value. High  $R$  and  $ED$  (i.e., clonal ramets all having approximately equal sizes) will result in a high  $\beta$  value (a steep slope), whereas low  $R$  and  $ED$  (i.e., a skewed clonal distribution with very few, large clonal lineages and many small ones) will result in a shallow slope (a low  $\beta$  value). For all these calculations, we used GenClone 2.0 (Arnaud-Haond and Belkhir 2007). Finally, a contingency  $\chi^2$  test was conducted to determine whether distribution of clone sizes was significantly different between populations of each species and between species.

Using the  $N_G$ , we estimated the following genetic diversity parameters with the programs POPGENE (Yeh et al. 1999) and FSTAT (Goudet 1995): percentage of polymorphic loci (% $P$ ), mean number of alleles per locus ( $A$ ), allelic richness ( $AR$ ) using a rarefaction method that compensates uneven population sample sizes (Hurlbert 1971; El Mousadik and Petit 1996), observed heterozygosity ( $H_o$ ), and Nei's (1978) unbiased gene diversity ( $H_d$ ).

To test for evidence of recent bottleneck events, for individual loci we evaluated the differences between the H–W expected heterozygosity ( $H_e$ ) and the equilibrium heterozygosity ( $H_{\text{eq}}$ ) expected assuming that populations are at mutation-drift equilibrium. These differences were evaluated using a sign test and a Wilcoxon sign-rank test conducted across loci under an infinite allele model with the program BOTTLENECK (Piry et al. 1999). Recently bottlenecked populations are expected to exhibit an excess of H–W equilibrium  $H_e$  relative to  $H_{\text{eq}}$  (Cornuet and Luikart 1996; Luikart et al. 1998) because loss of allelic diversity under genetic drift is expected to more rapidly reduce  $H_{\text{eq}}$  than  $H_e$  (Nei et al. 1975).

We estimated population-level  $F_{\text{IS}}$  (inbreeding) and calculated its significance level ( $P$  values) by gene permutation tests (999 replicates) under the null hypothesis ( $F_{\text{IS}} = 0$ ) using the program SPAGeDi (Hardy and Vekemans 2002). We also calculated Wright's (1965)  $F_{\text{IS}}$  and  $F_{\text{ST}}$  over loci following Weir and Cockerham (1984). These fixation indices measure the average deviation from the H–W equilibrium of individuals relative to their local populations ( $F_{\text{IS}}$ , a measure of local inbreeding) and local populations relative to the total population ( $F_{\text{ST}}$ , also a measure of differentiation between local populations). The significance of multipopulation  $F_{\text{IS}}$  and  $F_{\text{ST}}$  estimates was determined by a permutation test (999 randomizations of alleles between individuals within samples and 999 randomizations of genotypes between populations, respectively). These calculations were performed using FSTAT.  $F_{\text{IS}}$  and  $F_{\text{ST}}$  were only estimated for those populations that had sample sizes (i.e., number of MLG)  $\geq 5$ .

## Results

### Identification of Clones

For *P. stenophyllum*, 11 (*Adb-1*, *Adb-2*, *Dia-1*, *Dia-3*, *Idb-2*, *Mdb-1*, *Mdb-2*, *6Pgd-1*, *Pgi-2*, *Pgm-2*, and *Tpi-1*) of the 21 putative loci were polymorphic across 11 populations. Except for PS-10, number of polymorphic loci ranged from 0 to 3. Thus, the power to discriminate clonal genotypes from sexually produced genotypes was very low, ranging from 0 (no allozyme variation in PS-7) to 0.814 (PS-10) with an average of 0.276 (Table 1). Although the power was very low, we consider for all subsequent analyses that samples sharing identical MLG within populations were members of the same clone (see Justification for Single Clones and Clonal Diversity: Inference of Population History in the Discussion for further explanation of this consideration). At the population level, we identified a total of 33  $N_G$  (MLG) out of 470  $N_T$  (Table 1).  $N_G$  was very variable, with populations showing 1 (PS-1, PS-3, PS-5, PS-6, PS-7, PS-9, and PS-11), 3 (PS-2), 5 (PS-8 and PS-10), and 13 MLG (PS-4; Table 1). A careful inspection of Table 2 indicates, however, that the total number of different MLG was 31 instead of 33 (the MLG no. 3 in PS-2 is the same as the MLG no. 24 in PS-8, and the MLG in PS-5 is the same as that found in PS-6 (Table 2).

For *P. inflatum*, 7 (*Adb-3*, *Fe-1*, *Pgi-2*, *Pgi-3*, *6Pgd-1*, *6Pgd-2*, and *Tpi-2*) of the 21 putative loci were polymorphic. The power

**Table 2** MLG based on 11 polymorphic loci found in 11 populations of *Polygonatum stenophyllum*

| Population | MLG | N <sub>R</sub> | Adh-1 | Adh-2 | Dia-1 | Dia-3 | Idh-2 | Mdh-1 | Mdh-2 | 6Pgd-1 | Pgi-2 | Pgm-2 | Tpi-1 |
|------------|-----|----------------|-------|-------|-------|-------|-------|-------|-------|--------|-------|-------|-------|
| PS-1       | 1   | 36             | ab    | aa    | cc    | cc    | aa    | aa    | aa    | aa     | bc    | cc    | aa    |
| PS-2       | 2   | 36             | aa    | bb    | aa    | bb    | aa    | aa    | aa    | aa     | bb    | bc    | aa    |
|            | 3   | 6              | aa    | bb    | aa    | bb    | aa    | aa    | aa    | aa     | bb    | cc    | aa    |
|            | 4   | 4              | aa    | bb    | aa    | bb    | aa    | aa    | aa    | aa     | bb    | bb    | aa    |
| PS-3       | 5   | 21             | aa    | ab    | aa    | bb    | aa    | aa    | aa    | aa     | bc    | bb    | aa    |
| PS-4       | 6   | 40             | aa    | ab    | aa    | aa    | aa    | aa    | aa    | ac     | bb    | bb    | ab    |
|            | 7   | 8              | aa    | ab    | aa    | aa    | aa    | aa    | aa    | ac     | bb    | bb    | bb    |
|            | 8   | 5              | aa    | aa    | aa    | aa    | aa    | aa    | aa    | ac     | bb    | bb    | ab    |
|            | 9   | 4              | aa    | bb    | aa    | aa    | aa    | aa    | aa    | aa     | bb    | bb    | aa    |
|            | 10  | 3              | aa    | ab    | aa    | aa    | aa    | aa    | aa    | aa     | bb    | bb    | ab    |
|            | 11  | 2              | aa    | bb    | aa    | aa    | aa    | aa    | aa    | aa     | bb    | bb    | bb    |
|            | 12  | 2              | aa    | bb    | aa    | aa    | aa    | aa    | aa    | ac     | bb    | bb    | bb    |
|            | 13  | 2              | aa    | bb    | aa    | aa    | aa    | aa    | aa    | ac     | bb    | bb    | ab    |
|            | 14  | 2              | aa    | ab    | aa    | aa    | aa    | aa    | aa    | aa     | bb    | bb    | aa    |
|            | 15  | 2              | aa    | aa    | aa    | aa    | aa    | aa    | aa    | ac     | bb    | bb    | aa    |
|            | 16  | 2              | aa    | bb    | aa    | aa    | aa    | aa    | aa    | ac     | bb    | bb    | aa    |
|            | 17  | 1              | aa    | bb    | aa    | aa    | aa    | aa    | aa    | aa     | bb    | bb    | ab    |
|            | 18  | 1              | aa    | ab    | aa    | aa    | aa    | aa    | aa    | ac     | bb    | bb    | aa    |
| PS-5       | 19  | 31             | aa    | aa    | aa    | bb    | bb    | aa    | aa    | aa     | bb    | bc    | aa    |
| PS-6       | 20  | 68             | aa    | aa    | aa    | bb    | bb    | aa    | aa    | aa     | bb    | bc    | aa    |
| PS-7       | 21  | 33             | aa    | aa    | aa    | bb    | bb    | aa    | aa    | aa     | bb    | cc    | aa    |
| PS-8       | 22  | 66             | aa    | ab    | aa    | bb    | aa    | aa    | aa    | aa     | bb    | cc    | aa    |
|            | 23  | 11             | ab    | aa    | aa    | bb    | aa    | aa    | aa    | aa     | bb    | cc    | aa    |
|            | 24  | 6              | aa    | bb    | aa    | bb    | aa    | aa    | aa    | aa     | bb    | cc    | aa    |
|            | 25  | 5              | ab    | aa    | aa    | bb    | aa    | aa    | aa    | ac     | bb    | cc    | aa    |
|            | 26  | 3              | aa    | aa    | aa    | bb    | aa    | aa    | aa    | aa     | bb    | cc    | aa    |
| PS-9       | 27  | 13             | aa    | aa    | bb    | bb    | bb    | aa    | aa    | aa     | bb    | bc    | bb    |
| PS-10      | 28  | 25             | aa    | bb    | bb    | aa    | bb    | cc    | cc    | aa     | bb    | bb    | ab    |
|            | 29  | 7              | aa    | aa    | bb    | aa    | bb    | cc    | cc    | aa     | bb    | bb    | ab    |
|            | 30  | 5              | aa    | aa    | cc    | bb    | bb    | aa    | aa    | aa     | bb    | bc    | bb    |
|            | 31  | 3              | aa    | bb    | cc    | aa    | bb    | cc    | cc    | aa     | bb    | bb    | ab    |
|            | 32  | 2              | aa    | bb    | bb    | bb    | bb    | cc    | cc    | aa     | bb    | bb    | ab    |
| PS-11      | 33  | 15             | aa    | aa    | bb    | bb    | bb    | aa    | aa    | aa     | bc    | cc    | aa    |

Heterozygous genotypes are indicated by boxes. Note that the MLG #3 (PS-2) is the same as the MLG #24 (PS-8), and the MLG in PS-5 is the same as that in PS-6.

to discriminate clonal genotypes from sexually produced genotypes was greater than 0.95 (average  $P_{\text{gen}} F_{\text{IS}}$  was 0.031; Table 1). Thus, it was safe to consider for all subsequent analyses that neighboring ramets sharing identical MLG were members of the same clone. We identified a total of 75 ( $N_G$ ) distinct MLG out of 125 total samples ( $N_T$ ) across 4 populations (Table 1).

### Clonal Diversity

For 7 populations (PS-1, PS-3, PS-5, PS-6, PS-7, PS-9, and PS-11) of *P. stenophyllum*, estimates of genotypic richness ( $R$ ) and Simpson diversity indices ( $D$ ) were 0 because multiple ramets belonged to single genets (Table 1; Supplementary Table S1). Furthermore, the other 4 populations possessing 3 (PS-2), 5 (PS-8 and PS-10), and 13 (PS-4) genets exhibited low estimates of  $R$  (0.044–0.164),  $D$  (0.371–0.691), and Simpson  $ED$  (0.478–0.672; Table 1). Accordingly, average estimates of these parameters across 11 populations were very low (averages of  $R$ ,  $D$ , and  $ED$  were 0.032, 0.194, and 0.569, respectively; Table 1). Analyses of the Pareto index  $\beta$  were conducted only in 4 populations (PS-2, PS-4, PS-8, and PS-10). With the exception of PS-2, the  $\log_{10}$  of the cumulative distribution of ramets among genets was linearly related to the  $\log_{10}$  of  $N_R$  (the genet size or the number of ramets belonging to each genet), thus supporting the Pareto distribution hypothesis in a highly significant manner ( $R^2 = 0.939$ – $0.979$ ,  $P < 0.05$ ; Figure 2). The correlation for PS-2 was not significant probably due to the low number of points (only 3) in the scatter graph (i.e., with insufficient power to reject the null hypothesis,  $b_p = 0$ ;  $R^2 = 0.960$ ,  $P = 0.128$ ; Figure 2). However, the values of the Pareto index  $\beta$  ( $-1 \times$  regression slope,  $b_p$ ) were low for the 3 populations, ranging from 0.097 (PS-8) to 0.214 (PS-10) with a mean of 0.148 (Table 1). The  $b_p$  of PS-10 was significantly steeper than that of PS-8, as 95% CIs of  $b_p$  did not overlap (Table 1). We found significant differences in the distribution of clone sizes among 11 populations (contingency  $\chi^2$  test,  $\chi^2 = 290$ ,  $df = 180$ ,  $P = 0.000$ ; Supplementary Table S1). It is worthy to note that in all of the *P. stenophyllum* populations with multiple MLG, a single common MLG makes up more than half of the ramets that were sampled (Table 2).

Relative to *P. stenophyllum*, the 4 populations of *P. inflatum* maintained higher levels of genotypic diversity, with averages for  $R$ ,  $D$ , and  $ED$  of 0.588, 0.957, and 0.861, respectively (Table 1). The  $b_p$  estimates for all 4 populations of *P. inflatum* were significantly lower than the null hypothesis ( $b_p = 0$ ;  $R^2 = 0.898$ – $0.978$ ,  $P = 0.009$ – $0.027$ ; Figure 2). The values of the Pareto index  $\beta$  (with a mean of 1.195, ranging from 1.091 to 1.455; Table 1) were similar among them (as 95% CIs of  $b_p$  did overlap) and were substantially higher than those calculated in *P. stenophyllum* (as 95% CIs of  $b_p$  did not overlap; Table 1). Unlike *P. stenophyllum*, there were no significant differences in the distribution of clone sizes among the 4 populations of *P. inflatum* (contingency  $\chi^2$  test,  $\chi^2 = 4.35$ ,  $df = 12$ ,  $P = 0.976$ ; Supplementary Table S1). Accordingly, we found significant differences in the distribution of clone sizes between the 2 studied species (contingency  $\chi^2$  test,  $\chi^2 = 51$ ,  $df = 18$ ,  $P = 0.000$ ; Supplementary Table S1).

### Genetic Diversity and Structure

Populations of *P. stenophyllum* maintained low levels of allozyme variation ( $\%P = 9.5$ ,  $AR = 1.06$ ,  $A = 1.10$ , and  $H_e = 0.045$ ; Table 3). However, we found high levels of genetic variation in pooled samples ( $\%P = 52.4$ ,  $A = 1.62$ , and  $H_e = 0.171$ ; Table 3). In contrast, populations of *P. inflatum* harbored moderate levels of genetic variation ( $\%P = 25.0$ ,  $AR = 1.31$ ,  $A = 1.31$ , and  $H_e = 0.092$ ; Table 3). When samples were pooled, we found slightly higher levels of genetic variation ( $\%P = 33.3$ ,  $A = 1.48$ , and  $H_e = 0.106$ ; Table 3).

Except for PS-4, the sample size of the remaining populations of *P. stenophyllum* was less than 10, and thus, we only conducted the BOTTLENECK test in this population. We found a marginally significant signal of recent bottleneck (both with sign and Wilcoxon sign-rank tests; Table 4). Regarding *P. inflatum*, populations PI-1 and PI-3 displayed significant  $P$  values for both sign (although only marginally significant for PI-3) and Wilcoxon sign-rank test (Table 4).

Of the population-level  $F_{\text{IS}}$  estimates for the 4 populations of *P. stenophyllum* in which this parameter can be calculated, only that of PS-10 was significantly positive at the 0.05 level ( $F_{\text{IS}} = 0.697$ ; Table 3). This result, as well as the significant multipopulation level  $F_{\text{IS}}$  ( $F_{\text{IS}} = 0.316$ ,  $P = 0.001$ ; Table 3), indicates a substantial deficit of heterozygotes within populations. Among the 4 populations studied of *P. inflatum*, 3 populations (PI-1 to PI-3; Table 3) exhibited significant deficits of heterozygotes, and multipopulation level  $F_{\text{IS}}$  was also significant ( $F_{\text{IS}} = 0.285$ ,  $P = 0.001$ ; Table 3). *Polygonatum stenophyllum* showed a considerably higher  $F_{\text{ST}}$  value than *P. inflatum* ( $F_{\text{ST}} = 0.636$  vs.  $F_{\text{ST}} = 0.165$ ).

### Discussion

#### Justification for Single Clones and Clonal Diversity: Inference of Population History

We found that only 4 populations (PS-2, PS-4, PS-8, and PS-10) of *P. stenophyllum* were multiclonal, with the remaining 7 populations consisting of a single MLG (Table 1). Six out of 7 populations composed by 1 MLG had at least 1 heterozygous locus (1 in PS-5, PS-6, PS-9, and PS-11; 2 in PS-1 and PS-3; Table 2). If sexual reproduction occurred within these populations, homozygotes at these loci should be formed through recombination. In fact, there is evidence for segregation at those loci that are heterozygous for the most common MLG in the 4 populations with  $\geq 3$  MLG (*Adh-2*, *Pgd-1*, *Pgm-2*, and *Tpi-1*; Table 2): the 2 homozygotes for these loci are present in less frequent MLG, indicating that the most common MLG may have been the founding genotype and the homozygotes are its progeny. Except for PS-7, predominance of genets having at least 1 heterozygous locus in the uniclinal populations suggests that selection may have acted in favor of these clones at 1 or several stages of the life cycle (Lee and Chung 1999; Pappert et al. 2000). Assuming linkage equilibrium between allozyme loci and that they are located at different chromosomes, we expect a maximum of 708 588 MLG in the study samples (among 11 polymorphic

*Polygonatum stenophyllum*

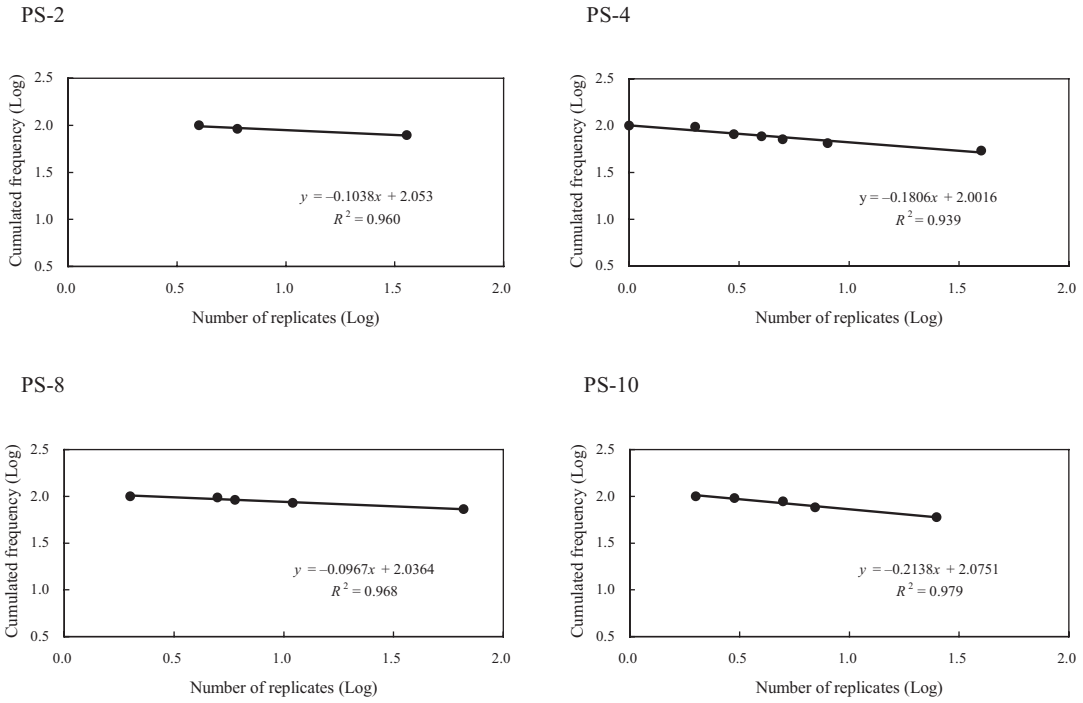

*Polygonatum inflatum*

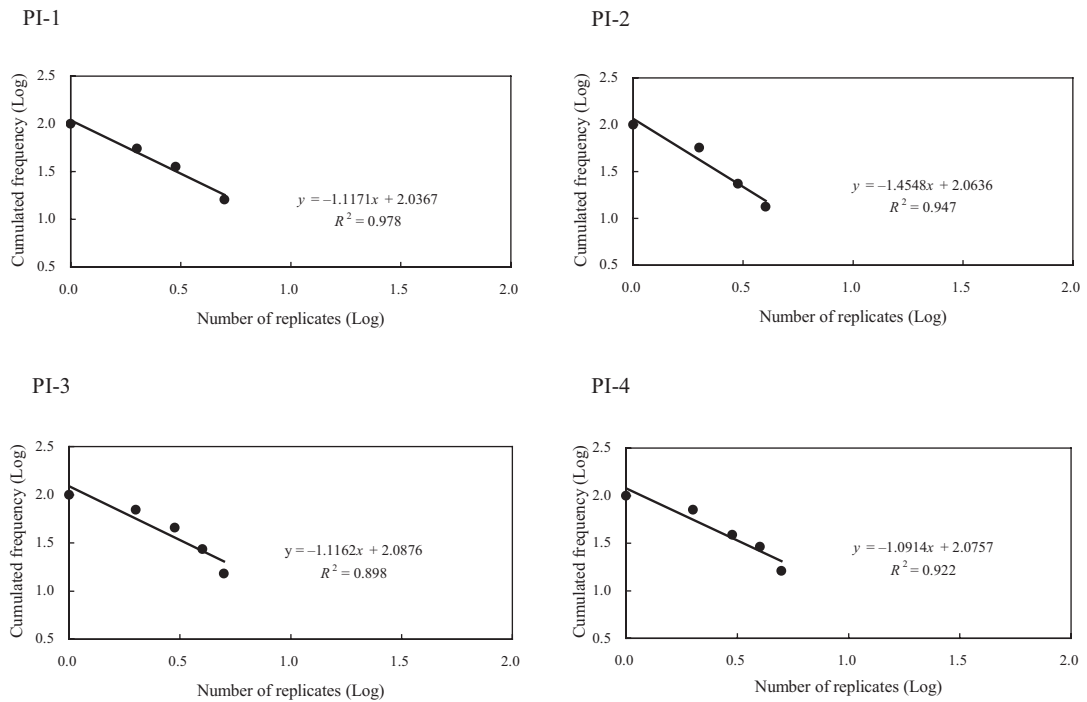

**Figure 2.** Pareto plots showing the distribution of putative clonal ramets in 4 populations of *Polygonatum stenophyllum* and in 4 populations of *P. inflatum*. Regression slope ( $b_p$ ) was obtained by plotting the double logarithmic linear regression of reverse cumulative frequency of the number of genes containing  $X$  or more ramets ( $N_{\geq X}$ ) on the number of sampled ramets belonging to a gene ( $X$ ) and  $R^2$  represents square of correlation coefficient (coefficient of determination) between  $N_{\geq X}$  on  $X$ .



**Table 3** Levels of genetic diversity in 11 populations of *Polygonatum stenophyllum* and in 4 populations of *Polygonatum inflatum*

| Species/population              | Altitude (m) | $N_G$ | %P   | AR   | A    | $H_o$ (SE)    | $H_e$ (SE)    | $F_{IS}$           |
|---------------------------------|--------------|-------|------|------|------|---------------|---------------|--------------------|
| <i>Polygonatum stenophyllum</i> |              |       |      |      |      |               |               |                    |
| PS-1                            | 145          | 1     | 9.5  | 1.10 | 1.10 | 0.095 (0.066) | 0.048 (0.033) | nc <sup>a</sup>    |
| PS-2                            | 96           | 3     | 4.8  | 1.03 | 1.05 | 0.016 (0.016) | 0.032 (0.032) | nc                 |
| PS-3                            | 86           | 1     | 9.5  | 1.10 | 1.10 | 0.095 (0.066) | 0.048 (0.033) | nc                 |
| PS-4                            | 11           | 13    | 14.3 | 1.07 | 1.14 | 0.066 (0.037) | 0.068 (0.037) | 0.027              |
| PS-5                            | 280          | 1     | 4.8  | 1.05 | 1.05 | 0.048 (0.048) | 0.024 (0.024) | nc                 |
| PS-6                            | 204          | 1     | 4.8  | 1.05 | 1.05 | 0.048 (0.048) | 0.024 (0.024) | nc                 |
| PS-7                            | 71           | 1     | 0.0  | 1.00 | 1.00 | 0.000 (0.000) | 0.000 (0.000) | nc                 |
| PS-8                            | 45           | 5     | 14.3 | 1.05 | 1.14 | 0.038 (0.022) | 0.050 (0.029) | 0.238              |
| PS-9                            | 135          | 1     | 4.8  | 1.05 | 1.05 | 0.048 (0.048) | 0.024 (0.024) | nc                 |
| PS-10                           | 140          | 5     | 33.3 | 1.14 | 1.33 | 0.048 (0.039) | 0.157 (0.053) | 0.697*             |
| PS-11                           | 190          | 1     | 4.8  | 1.05 | 1.05 | 0.048 (0.048) | 0.024 (0.024) | nc                 |
| Average                         | 128          | 3     | 9.5  | 1.06 | 1.10 | 0.050 (0.009) | 0.045 (0.013) | 0.316 <sup>b</sup> |
| Pooled samples                  |              | 33    | 52.4 |      | 1.62 |               | 0.171 (0.044) |                    |
| <i>Polygonatum inflatum</i>     |              |       |      |      |      |               |               |                    |
| PI-1                            | 1240         | 20    | 23.8 | 1.29 | 1.29 | 0.069 (0.030) | 0.099 (0.042) | 0.304*             |
| PI-2                            | 1180         | 20    | 28.6 | 1.38 | 1.38 | 0.062 (0.023) | 0.096 (0.037) | 0.357*             |
| PI-3                            | 980          | 18    | 19.1 | 1.24 | 1.24 | 0.053 (0.027) | 0.086 (0.041) | 0.386*             |
| PI-4                            | 580          | 17    | 28.6 | 1.33 | 1.33 | 0.081 (0.032) | 0.086 (0.033) | 0.057              |
| Average                         | 995          | 19    | 25.0 | 1.31 | 1.31 | 0.066 (0.006) | 0.092 (0.003) | 0.285 <sup>b</sup> |
| Pooled samples                  |              | 75    | 33.3 |      | 1.48 |               | 0.106 (0.038) |                    |

%P, percentage of polymorphic loci; AR, mean allelic richness; A, mean number of alleles per locus;  $H_o$ , observed heterozygosity;  $H_e$ , H-W expected heterozygosity or genetic diversity; SE, standard error;  $F_{IS}$ , fixation index within populations.

AR is adjusted for a sample size of 1 and 17 plants for *P. stenophyllum* and *P. inflatum*, respectively.

<sup>a</sup>nc, not conducted (analysis of  $F_{IS}$  within populations was only conducted for populations with  $N_G \geq 5$ ).

<sup>b</sup>Significant Weir and Cockerham (1984) estimate of  $F_{IS}$  over 3 populations.

\*Denotes significance ( $P < 0.05$ ) based on permutation (999 replicates) under the null hypothesis of  $F_{IS} = 0$ .

**Table 4** Results of statistical tests for evidence of recent population bottlenecks in PS-4 of *Polygonatum stenophyllum* and in 4 populations of *Polygonatum inflatum*

| Species/population              | Sign test    | Wilcoxon sign-rank test |
|---------------------------------|--------------|-------------------------|
| <i>Polygonatum stenophyllum</i> |              |                         |
| PS-4                            | 0.094        | 0.063                   |
| <i>Polygonatum inflatum</i>     |              |                         |
| PI-1                            | <b>0.032</b> | <b>0.016</b>            |
| PI-2                            | 0.442        | 0.500                   |
| PI-3                            | 0.068        | <b>0.031</b>            |
| PI-4                            | 0.326        | 0.656                   |

Note that tests were conducted only in the population PS-4 of *P. stenophyllum* because the number of the different MLG (putative genets) was less than 10 in the remaining 10 populations. Numbers reported are  $P$  values of sign and Wilcoxon sign-rank tests conducted using the program BOTTLENECK, and significant  $P$  values (at the 0.05 level) are boldfaced.

loci, 9 loci can have 3 different genotypes and 2 loci can have 6 genotypes, thus,  $3^9 \times 6^2$ ). However, we only found 31 different MLG (Table 2). These results strongly suggest that the 7 populations consist of single clones (uniclinal) and support the first hypothesis (shoots belong to a single or a few clones). Limitation of sexual reproduction also suggests that *P. stenophyllum* is self-incompatible, although this should be confirmed by further studies on the breeding system.

As the probability of finding an identical MLG of *P. stenophyllum* is high, 2 MLG can be identical by chance alone. This might be the case of the identical MLG found in PS-2 and PS-8 (no. 3 and no. 24, respectively) because there is no obvious connection between PS-2 and PS-8 (there is no possibility of rhizome[s] transportation by river water between PS-2 and PS-8; Figure 1). In contrast, the uniclinal populations PS-5 (280 m a.s.l.) and PS-6 (204 m a.s.l.) show an identical MLG because the latter was probably founded through rhizome(s) transportation by water from the former (PS-5 is located upstream on the same river; Figure 1). Based on uniqueness of MLG composition and location and topographic traits of populations (Figure 1; Table 3), the other uniclinal populations of *P. stenophyllum* in addition to PS-5 (PS-1, PS-3, PS-7, PS-9, and PS-11) were probably founded by single seeds from genetically diverse source populations (perhaps transported by birds), suggesting that the ISR model fits for these populations. It is highly likely that PS-9 (135 m a.s.l.) was established by a single seed from PS-10 (140 m), as they are closely located (separated by 87 m in linear distance). The 4 multiclinal populations of *P. stenophyllum* (PS-2, PS-4, PS-8, and PS-10) were likely established by a few seeds from multiclinal sources, suggesting that they fit better a RSR model. Thus, our results do not fully support the second hypothesis, as RSR seems to have been operating within the multiclinal populations of *P. stenophyllum* instead of the ISR model. For *P. inflatum*, the skewed distribution of ramet numbers per genet (Supplementary Table

S1) strongly suggests that the RSR model is characteristic of their populations, in agreement with the second hypothesis.

Inference of the RSR model is further supported by levels of genotypic diversity. Levels of clonal (genotypic) diversity ( $R$ ,  $D$ ,  $ED$ , and the Pareto index  $\beta$ ) found in *P. stenophyllum* populations were considerably lower than those for *P. inflatum*. The Pareto index  $\beta$  is well suited for summarizing clonal diversity and for making comparisons among different studies (Arnaud-Haond et al. 2007; Ohsako 2010). The mean value of  $\beta$  (0.148) for *P. stenophyllum* is substantially lower than the average value from 15 populations belonging to 11 terrestrial and marine plant species compiled by Ohsako (2010;  $\beta = 0.930$ ). In contrast, the mean value of  $\beta$  (1.195) for *P. inflatum* is higher than the Ohsako's (2010) average. Low values of  $\beta$  indicate that populations of *P. stenophyllum*, unlike other clonal plants (including *P. inflatum*), have a tendency towards being formed by a few large clones and several small ones (Supplementary Table S1). In agreement with this distribution, genotypic richness ( $R$ ) values found in the 11 populations of *P. stenophyllum* (mean  $R = 0.032$ ) are substantially lower than the average (0.294) for the 11 clonal plant species reported by Ohsako (2010). Like  $\beta$  value, the mean value of  $R$  (0.588) for *P. inflatum* is higher than the Ohsako's average. This pattern of genotypic diversity exhibited by *P. stenophyllum* and *P. inflatum* support the third hypothesis: within-population clonal (genotypic) diversity found in *P. stenophyllum* is considerably lower than that of *P. inflatum*. A high level of within-population genotypic diversity in *P. inflatum* further suggests that the RSR model is fitted for this species.

### Genetic Diversity and Structure: Mountains as a Glacial Refugium

As predicted by the third hypothesis, within-population genetic variation and among-population differentiation found in *P. stenophyllum* are lower and higher than those exhibited by *P. inflatum*. Populations of *P. stenophyllum* maintain lower levels of genetic variation than those averaged for short-lived herbaceous perennials ( $\%P = 28.0$ ,  $A = 1.40$ , and  $H_e = 0.096$ ; Hamrick and Godt 1990), whereas populations of *P. inflatum* show comparable levels to Hamrick and Godt's (1990) averages. The genetic differentiation between populations of *P. stenophyllum* ( $F_{ST} = 0.636$ ) is substantially higher than that of *P. inflatum* ( $F_{ST} = 0.165$ ) and also than that averaged for short-lived herbaceous perennials and monocots ( $G_{ST} = 0.233$  and  $0.231$ , respectively; Hamrick and Godt 1990). The most likely explanation of why contemporary populations of *P. stenophyllum* (except for PS-10) maintain extremely low levels of within-population genetic variation (as well as low clonal diversity) and very high among-population differentiation is that they were established by a single or by a few seeds. Founder effects usually lead to decreased within-population genetic variation and increased among-population genetic divergence (e.g., Westerbergh and Saura 1994). When samples are pooled as a whole, *P. stenophyllum* is more variable than *P. inflatum* ( $\%P = 52.4$  vs.  $33.3$ ,  $A = 1.62$  vs.  $1.48$ , and  $H_e = 0.171$  vs.  $0.106$ ; Table 3) and short-lived herbaceous perennials ( $\%P_s = 41.3$ ,  $A_s = 1.70$ , and  $H_{es} = 0.116$ ; Hamrick and Godt 1990). This result reflects population

genetics theory that founder effects should affect the levels and distribution of genetic diversity within and among populations of plant species, but it should have relatively little effect on the level of genetic diversity within species as a whole (Halliburton 2004). That is, the high levels of genetic diversity at the species level found in *P. stenophyllum* should be attributed to the high among-population genetic differentiation ( $F_{ST} = 0.636$ ).

Why does the population PS-10 of *P. stenophyllum* maintain moderate levels of genetic variation? Chung et al. (2012) hypothesized that the Baekdudaegan mountain range served as a refugium for the boreal montane vegetation during the Last Glacial Maximum (LGM). In this regard, we should acknowledge the location of the genetically highest diverse population PS-10, at the foot of the Baekdudaegan mountain range (the other *P. stenophyllum* population located in this mountains, PS-9, is probably the result of a founder effect from the nearby PS-10; see section Justification for Single Clones and Clonal Diversity: Inference of Population History). PS-10 harbored 7 polymorphic loci (*Adb-2*, *Dia-1*, *Dia-3*, *Mdb-1*, *Mdb-2*, *Pgm-2*, and *Tpi-1*) and maintained moderate levels of within-population variation ( $\%P = 33.3$ ,  $A = 1.33$ , and  $H_e = 0.157$ ; Table 3). In addition, we found that PS-10 has a more even distribution of MLG (Supplementary Table S1). Levels of genetic variation for the population PS-10 of *P. stenophyllum* and for all the populations of *P. inflatum* (that also occurs on the Baekdudaegan) are comparable to the values reported for other species growing in this mountain system, including the herbaceous perennials *Adenophora grandiflora*, *Bupleurum euphorioides*, *Cypripedium macranthos*, *Hanabusaya asiatica*, *Megaleranthis saniculifolia*, *Oreorchis patens*, and *Parasenecio pseudotaimingasa*, the shrub *Forsythia ovata*, and the coniferous tree *Taxus cuspidata* (Table 3 in Chung et al. 2013). The common genetic diversity patterns for these species suggest the existence of multiple, continuous refugia along the Baekdudaegan during the LGM, which would have enabled plant species to maintain relatively large population sizes and high rates of recurrent gene flow (Chung and Chung 2014). This scenario would be favored by the topography, as it allowed tracking the quaternary climatic oscillations by altitudinal migrations (Chung et al. 2012) and by the local environmental conditions (with a continuous water supply through the orographic rain and the closely related Pacific Ocean; Yi 2011).

### Conservation Implications

*Polygonatum stenophyllum* is a species of interest in conservation, as it is included in the Wildlife Protection Act of Korea (Ministry of Environment 2005). Preservation of its genetic diversity in South Korea should be ensured, as Korean populations might harbor some unique genetic traits (e.g., private alleles) compared with the other populations within the species range. Thus, we propose that efforts toward conservation management should be aimed at preserving (and ideally increasing) the number and size of current populations (i.e., number of genetically distinct individuals, genets). It should be noted that the 7 uniclinal populations might have only a single sexual individual (i.e., effective number of

population size is equal to 1); one may expect, thus, that the 7 uniclinal populations of *P. stenophyllum* would almost certainly become extinct without the introduction of genotypic diversity. However, a dynamics of extinction-recolonization would occur relatively frequently in highly disturbed populations such as those that characterize this species; in this regard, it is necessary to carry out a long-term study on population dynamics prior to proceed with any reinforcement.

## Supplementary Material

Supplementary material can be found at <http://www.jhered.oxfordjournals.org/>.

## Funding

National Institute of Biological Resources (to M.G.C.); the Basic Science Program through the National Research Foundation of Korea (NRF-2013R1A1A3010892) funded by the Ministry of Education, Science and Technology, the Republic of Korea (to M.Y.C.).

## Acknowledgments

The authors thank Beom Jin Shim, Myeong Soon Park, and Dong Uk Yeo for laboratory assistance.

## References

- Amat ME, Silvertown J, Vargas P. 2013. Strong spatial genetic structure reduces reproductive success in the critically endangered plant genus *Pseudomisopates*. *J Hered.* 104:692–703.
- Arnaud-Haond S, Belkhir K. 2007. GENCLONE: a computer program to analyze genotypic data, test for clonality and describe spatial organization. *Mol Ecol Notes.* 7:15–17.
- Arnaud-Haond S, Duarte CM, Alberto F, Serrão EA. 2007. Standardizing methods to address clonality in population studies. *Mol Ecol.* 16:5115–5139.
- Balloux F, Lehmann L, de Meeu's T. 2003. The population genetics of clonal and partially clonal diploids. *Genetics.* 164:1635–1644.
- Becheler R, Diekmann O, Hily C, Moalic Y, Arnaud-Haond S. 2010. The concept of population in clonal organisms: mosaics of temporally colonized patches are forming highly diverse meadows of *Zostera marina* in Brittany. *Mol Ecol.* 19:2394–2407.
- Charpentier A, Grillas P, Thompson JD. 2000. The effects of population size limitation on fecundity in mosaic populations of the clonal macrophyte *Scirpus maritimus* (Cyperaceae). *Am J Bot.* 87:502–507.
- Cheliak WM, Pitel JP. 1984. Technique for starch gel electrophoresis of enzyme from forest tree species. Information report P1-X-42. Ontario (Canada): Petawawa National Forestry Institute, Canadian Forestry Service, Agriculture Canada.
- Chen X, Tamura MN. 2000. *Polygonatum Miller*. In: Wu ZY, Raven PH, Hong DY, editors. *Flora of China*. Vol. 24 (Liliaceae). Beijing (China): Science Press. p. 224–233.
- Chung MG, Hamrick JL, Jones SB Jr, Derda GS. 1991. Isozyme variation within and among populations of *Hosta* (Liliaceae) in Korea. *Syst Bot.* 16:667–684.
- Chung MG, Kang SS. 1994. Genetic variation and population structure in Korean populations of *Eurya japonica* (Theaceae). *Am J Bot.* 81:1077–1082.
- Chung MY, Chung MG. 2014. Large effective population sizes and high levels of gene flow between subpopulations of *Lilium cernuum* (Liliaceae). *Biochem Syst Ecol.* 54:354–361.
- Chung MY, Chung JM, López-Pujol J, Park SJ, Chung MG. 2013. Genetic diversity in three species of *Forsythia* (Oleaceae) endemic to Korea: implications for population history, taxonomy, and conservation. *Biochem Syst Ecol.* 47:80–92.
- Chung MY, López-Pujol J, Maki M, Kim KJ, Chung JM, Sun BY, Chung MG. 2012. Genetic diversity in the common terrestrial orchid *Oreorchis patens* and its rare congener *Oreorchis coreana*: inference of species evolutionary history and implications for conservation. *J Hered.* 103:692–702.
- Clayton JW, Tretiak DN. 1972. Amine citrate buffers for pH control in starch gel electrophoresis. *J Fisher Res Board Canad.* 29:1169–1172.
- Cornuet JM, Luikart G. 1996. Description and power analysis of two tests for detecting recent population bottlenecks from allele frequency data. *Genetics.* 144:2001–2014.
- DeFilippis RA. 1980. *Polygonatum Miller*. In: Tutin TG, editor. *Flora Europaea*. Vol. 5, Cambridge (NY): Cambridge University Press. p. 70–71.
- Dorken ME, Eckert CG. 2001. Severely reduced sexual reproduction in northern populations of a clonal plant, *Decodon verticillatus* (Lythraceae). *J Ecol.* 89:339–350.
- El Mousadik A, Petit RJ. 1996. High level of genetic differentiation for allelic richness among populations of the argan tree [*Argania spinosa* (L.) Skeels] endemic to Morocco. *Theor Appl Genet.* 92:832–839.
- Eriksson O. 1989. Seedling dynamics and life histories in clonal plants. *Oikos.* 55:231–238.
- Eriksson O. 1993. Dynamics of genets in clonal plants. *Trends Ecol Evol.* 8:313–316.
- Godt MJW, Hamrick JL. 2001. Genetic diversity in rare southeastern plants. *Nat Areas J.* 21:61–70.
- Godt MJW, Race T, Hamrick JL. 1997. A population genetic analysis of *Ziziphys celata*, an endangered Florida shrub. *J Hered.* 88:531–533.
- Goudet J. 1995. FSTAT (Version 1.2): a computer program to calculate F-statistics. *J Hered.* 86:485–486.
- Gutián J, Gutián P, Medrano M. 2001. Causes of fruit set variation in *Polygonatum odoratum* (Liliaceae). *Plant Biol.* 3:637–641.
- Gutián J, Medrano M, Oti JE. 2004. Variation in floral sex allocation in *Polygonatum odoratum* (Liliaceae). *Ann Bot.* 94:433–440.
- Halliburton R. 2004. Introduction to population genetics. Upper Saddle River (NJ): Pearson Education, Inc.
- Hamrick JL, Godt MJW. 1990. Allozyme diversity in plant species. In: Brown AHD, Clegg MT, Kahler AL, Weir BS, editors. *Plant population genetics, breeding and genetic resources*. Sunderland (MA): Sinauer Associates. p. 43–63.
- Hardy OJ, Vekemans X. 2002. SPAGeDi: a versatile computer program to analyze spatial genetic structure at the individual or population levels. *Mol Ecol Notes.* 2:618–620.
- Hasegawa T, Kudo G. 2005. Comparisons of growth schedule, reproductive property and allocation pattern among three rhizomatous *Polygonatum* species with reference to their habitat types. *Plant Species Biol.* 20:23–32.
- Haufler CH. 1985. Enzyme variability and modes of evolution in *Bommeria* (Pteridaceae). *Syst Bot.* 10:92–104.
- Honnay O, Bossuyt B. 2005. Prolonged clonal growth: escape route or route to extinction? *Oikos.* 108:427–432.
- Hurlbert SH. 1971. The nonconcept of species diversity: a critique and alternative parameters. *Ecology.* 52:577–586.

- Karron JD. 1987. A comparison of levels of genetic polymorphism and self-compatibility in geographically restricted and widespread plant congeners. *Evol Ecol*. 1:47–58.
- Kerley GIH, Tiver F, Whitford WG. 1993. Herbivory of clonal populations: cattle browsing affects reproduction and population structure of *Yucca elata*. *Oecologia*. 93:12–17.
- Kosiński, I. 2012. Generative reproduction dynamics in populations of the perennial herb *Polygonatum multiflorum* (Asparagaceae). *Ann Bot Fennici*. 49:217–228.
- Kudoh H, Shibaike H, Takasu H, Whigham DH, Kawano S. 1999. Genet structure and determinants of clonal structure in a temperate deciduous woodland herb, *Urnularia perfoliata*. *J Ecol*. 87:244–257.
- Lee NW, Chung MG. 1999. High levels of genetic variation in Korean populations of *Sasamorpha borealis* (Poaceae). *Bot Bull Acad Sin*. 40:311–317.
- Losos JB. 2008. Phylogenetic niche conservatism, phylogenetic signal and the relationship between phylogenetic relatedness and ecological similarity among species. *Ecol Lett*. 11:995–1003.
- Luikart G, Allendorf FW, Cornuet JM, Sherwin WB. 1998. Distortion of allele frequency distributions provides a test for recent population bottlenecks. *J Hered*. 89:238–247.
- Ministry of Environment. 2005. Wildlife protection act. Gwacheon (Republic of Korea): Ministry of Environment.
- Nei M. 1978. Estimation of average heterozygosity and genetic distance from a small number of individuals. *Genetics*. 89:583–590.
- Nei M, Maruyama T, Chakraborty R. 1975. The bottleneck effect and genetic variability in populations. *Evolution*. 29:1–10.
- Ohara M, Tamura M, Hirose T, Hiei K, Kawano S. 2007. Life-history monographs of Japanese plants. 8: *Polygonatum odoratum* (Miller) Druce var. *pluriflorum* (Miq.) Ohwi (Convallariaceae). *Plant Species Biol*. 22:59–64.
- Ohsako T. 2010. Clonal and spatial genetic structure within populations of a coastal plant, *Carex kobomugi* (Cyperaceae). *Am J Bot*. 97:458–470.
- Pappert RA, Hamrick JL, Donovan LA. 2000. Genetic variation in *Pueraria lobata* (Fabaceae), an introduced, clonal, invasive plant of the southeastern United States. *Am J Bot*. 87:1240–1245.
- Parks JC, Werth CR. 1993. A study of spatial features of clones in a population of bracken fern, *Pteridium aquilinum* (Dennstaedtiaceae). *Am J Bot*. 80:537–544.
- Pielou EC. 1969. An introduction to mathematical ecology. New York: Wiley-Interscience.
- Piry S, Luikart G, Cornuet J-M. 1999. Bottleneck: a computer program for detecting recent reductions in the effective population size using allele frequency data. *J Hered*. 90:502–503.
- Schaal BA, Leverich WJ. 1996. Molecular variation in isolated plant populations. *Plant Species Biol*. 11:33–40.
- Soltis DE, Haufler CH, Darrow DC, Gastony GJ. 1983. Starch gel electrophoresis of ferns: a compilation of grinding buffers, gel and electrode buffers, and staining schedules. *Am Fern J*. 73:9–27.
- Song J-M, Lee G-Y, Yi J-S. 2009. Growth environment and vegetation structure of natural habitat of *Polygonatum stenophyllum* Maxim. *J Forest Sci*. 25:187–194.
- Thompson JN. 1981. Elaisomes and fleshy fruits: phenology and selection pressures for ant-dispersed seeds. *Am Nat*. 117:104–108.
- Weeden NF, Wendel JF. 1989. Genetics of plant isozymes. In: Soltis DE, Soltis PS, editors. *Isozymes in plant biology*. Portland (OR): Dioscorides Press. p. 46–72.
- Weir BS, Cockerham CC. 1984. Estimating F-statistics for the analysis of population structure. *Evolution*. 38:1358–1370.
- Westerbergh A, Saura A. 1994. Genetic differentiation in endemic *Silene* (Caryophyllaceae) on the Hawaiian Islands. *Am J Bot*. 81:1487–1493.
- Wright S. 1965. The interpretation of population structure by F-statistics with special regard to systems of mating. *Evolution*. 19:395–420.
- Yasaka M, Sunaga Y, Kawasaki F, Kanno Y. 1994. Effect of forest fragmentation on the fruit set ratio for three perennial herbs. *Jpn J Ecol*. 44:1–7.
- Yeh FC, Yang RC, Boyle TBJ. 1999. POPGENE version 1.32, microsoft window-based free ware for population genetic analysis. [cited 2011 May 14]. Available from: <http://www.ualberta.ca/~fyeh/index.htm>
- Yi S. 2011. Holocene vegetation responses to East Asian monsoonal changes in South Korea. In: Blanco J, Kheradmand H, editors. *Climate change – geophysical foundations and ecological effects*. Rijeka (Croatia): InTech. p. 157–178.

Received December 6, 2013; First decision February 4, 2014;  
Accepted June 2, 2014

Corresponding Editor: Andrew Jones
